# Supplementary material for: An urchin-like Co-doped NiS2/C nanorod array with enriched sulfur vacancies for asymmetric supercapacitors
Source: Royal Society of Chemistry journal article supplement (doi:10.1039/d3ta00862b), 2023-01-01
Supplement: d3ta00862b1.pdf [file d3ta00862b1.pdf]

## Supporting Information

### Urchin-like Co-doped NiS<sub>2</sub>/C nanorod array with enriched sulfur vacancy for asymmetric supercapacitors

Jingjing Hu, Li Sun\*, Feng Xie, Yaru Qu, Hankun Tan, Yihe Zhang\*

*Engineering Research Center of Ministry of Education for Geological Carbon Storage and Low Carbon Utilization of Resources, Beijing Key Laboratory of Materials Utilization of Nonmetallic Minerals and Solid Wastes, National Laboratory of Mineral Materials, School of Materials Science and Technology, China University of Geosciences, Beijing, 100083, PR China*

\*Corresponding authors

E-mail address: sunli@cugb.edu.cn, zyh@cugb.edu.cn

**First-principles Calculation:** To calculate the electronic structures, first-principles calculations were carried out with the spin-polarized Generalized Gradient Approximation (GGA) by adopting the Perdew–Burke–Ernzerh (PBE) exchange-correlation parameterization to the Density Functional Theory (DFT) incorporating the LDA+U formalism using the CASTEP program. A plane-wave basis with a kinetic energy cutoff of 400.0 eV and a Monkhorst-Pack grid with a 4×4×4 k-point mesh for the Brillouin zone integration were used value of the smearing was 0.2 eV. The electronic minimization parameter of the total energy/atom convergence tolerance was  $5.0 \times 10^{-6}$  eV. The OH adsorption energy calculation was based on the equation:

$$E_{ads}(OH) = E_{total}(sur + OH) - E_{total}(OH) - E_{total}(sur)$$

where  $E_{total}(sur + OH)$ ,  $E_{total}(sur)$  and  $E_{total}(OH)$  represent the total energy of slab after adsorption, the energy of the bare slab and the energy of the adsorbate OH<sup>-</sup> species, respectively.

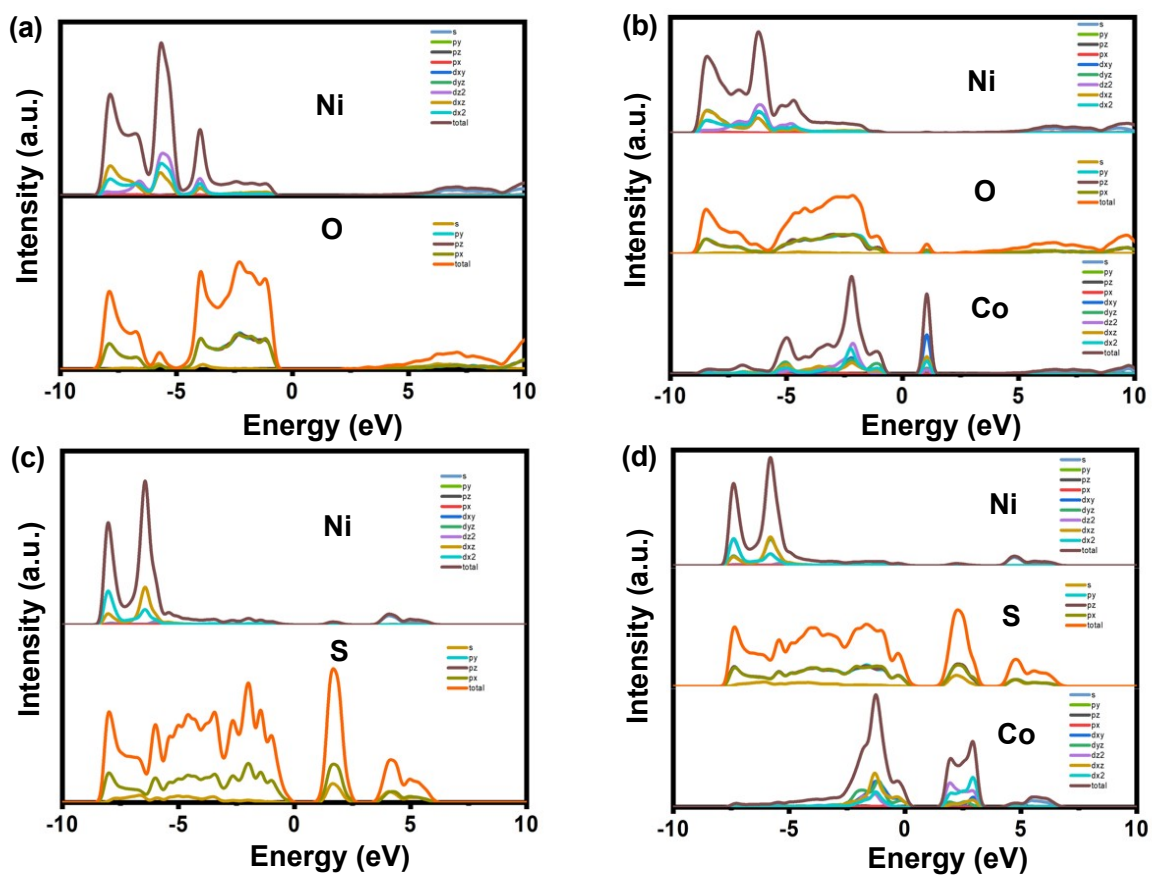

**Figure S1** Total densities of states of and projected densities of states of (a) NiO, (b) Co-NiO, (c) NiS<sub>2</sub> and Co-NiS<sub>2</sub>.

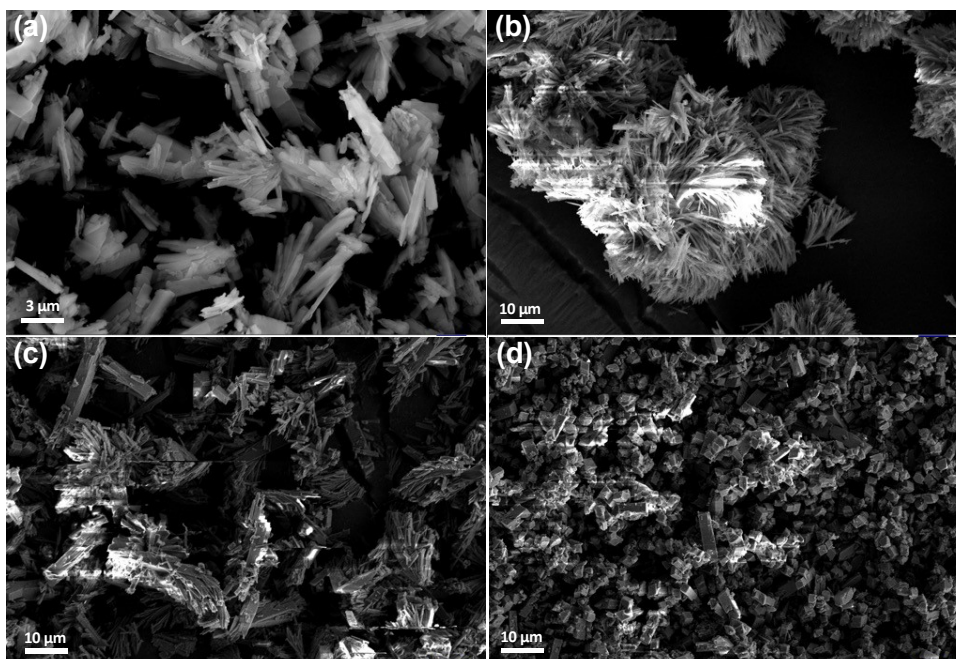

**Figure S2** SEM images of Co-BTC with the Ni/Co ratio of (a) 1:0, (b) 1:0.5, (c) 1:1 and (d) 0:1.

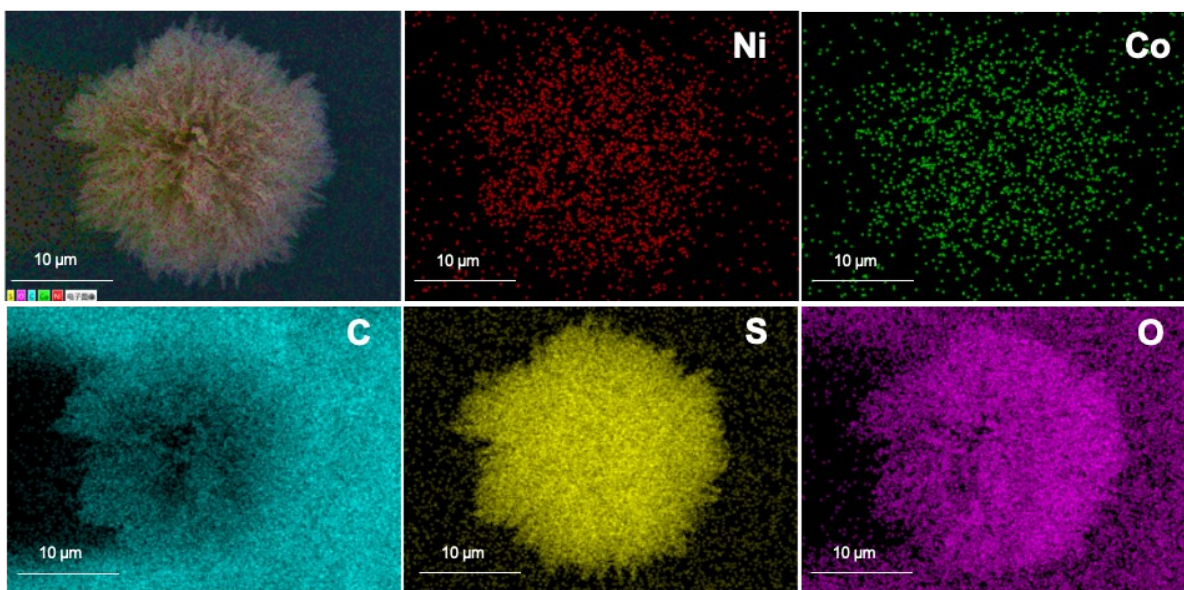

**Figure S3** EDS mapping images of Co-NiS<sub>2</sub>/C.

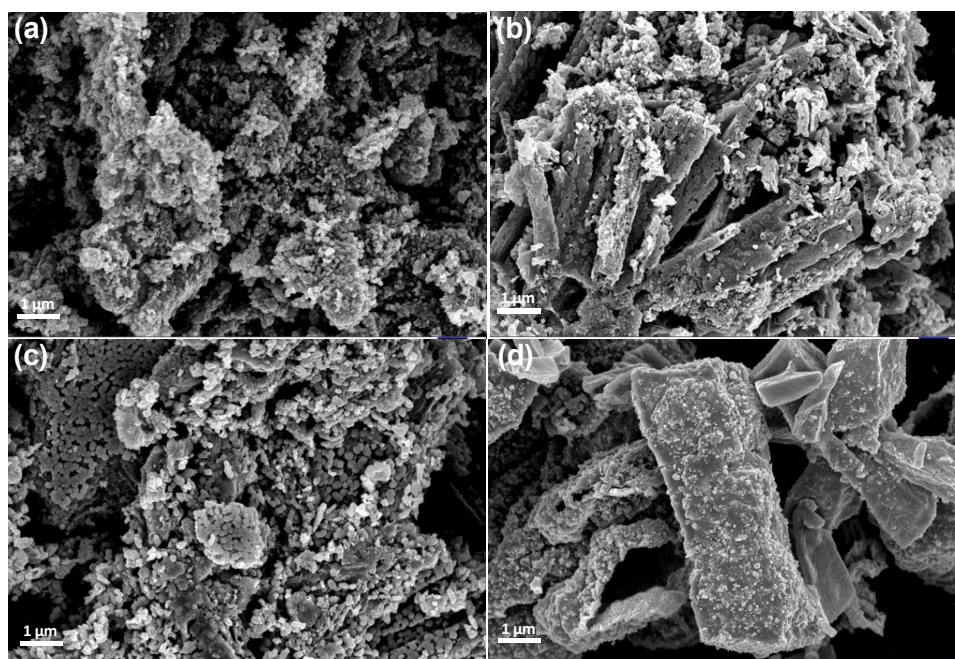

**Figure S4** SEM images of Co-NiS<sub>2</sub>/C with the Ni/Co ratio of (a) 1:0, (b) 1:0.5, (c) 1:1, (d) 0:1.

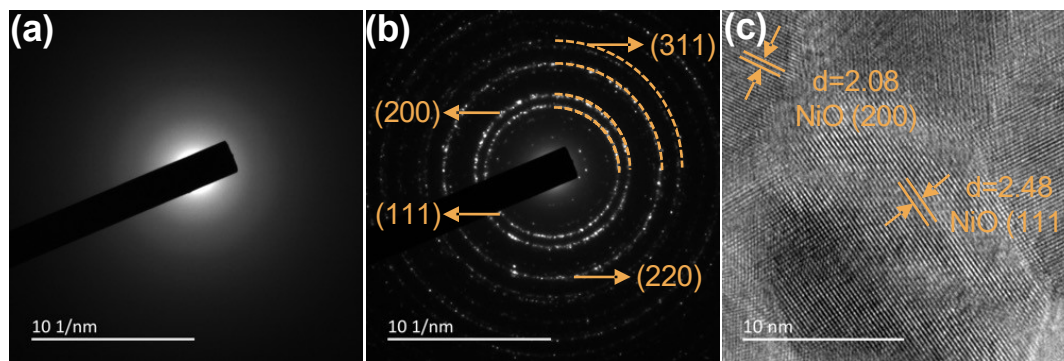

**Figure S5** SAED images of (a) Co-NiBTC and (b) Co-NiO. (c) HRTEM of Co-NiO.

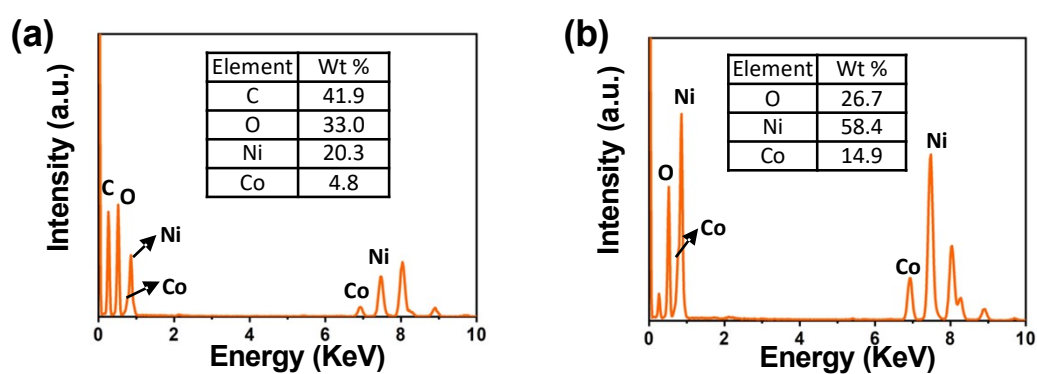

**Figure S6** EDS analysis spectrum of (a) Co-NiBTC and (b) Co-NiO.

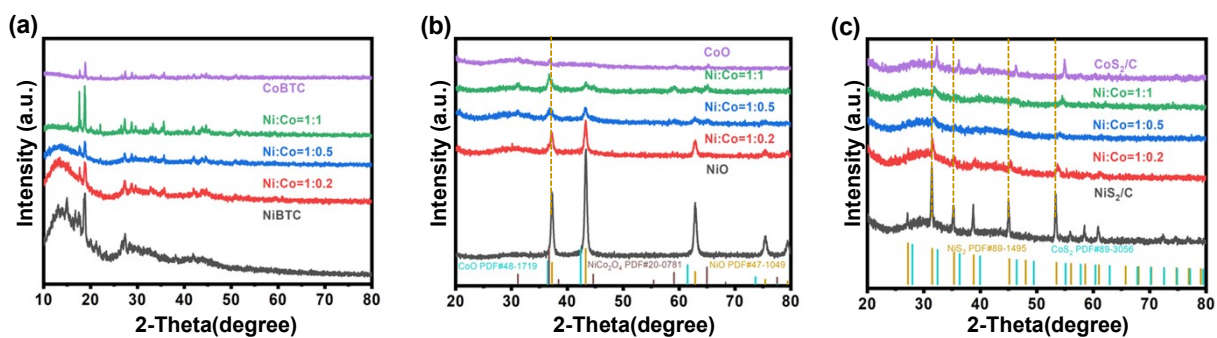

**Figure S7** XRD patterns (a) Co-NiBTC, (b) Co-NiO and (c) Co-NiS<sub>2</sub>/C with different Ni/Co ratios.

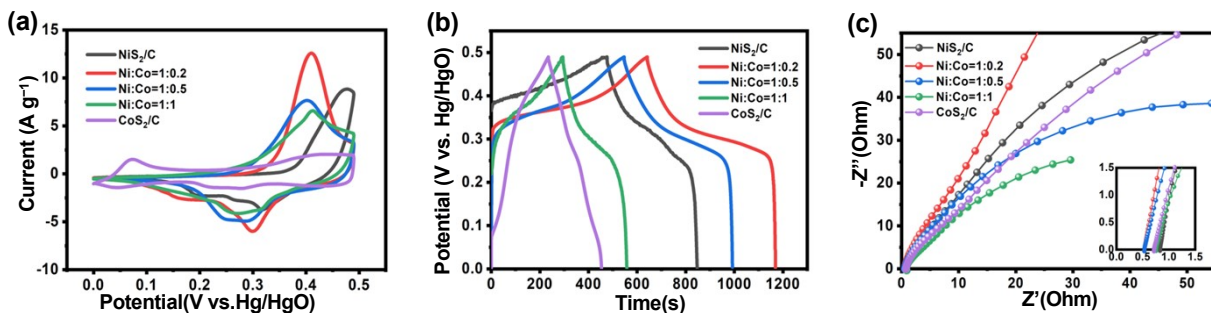

**Figure S8** (a) CV curves, (b) GCD curves and (c) Nyquist plots of Co-NiS<sub>2</sub>/C with different Ni/Co ratio of 1:0, 1:0.2, 1:0.5, 1:1 and 0:1.

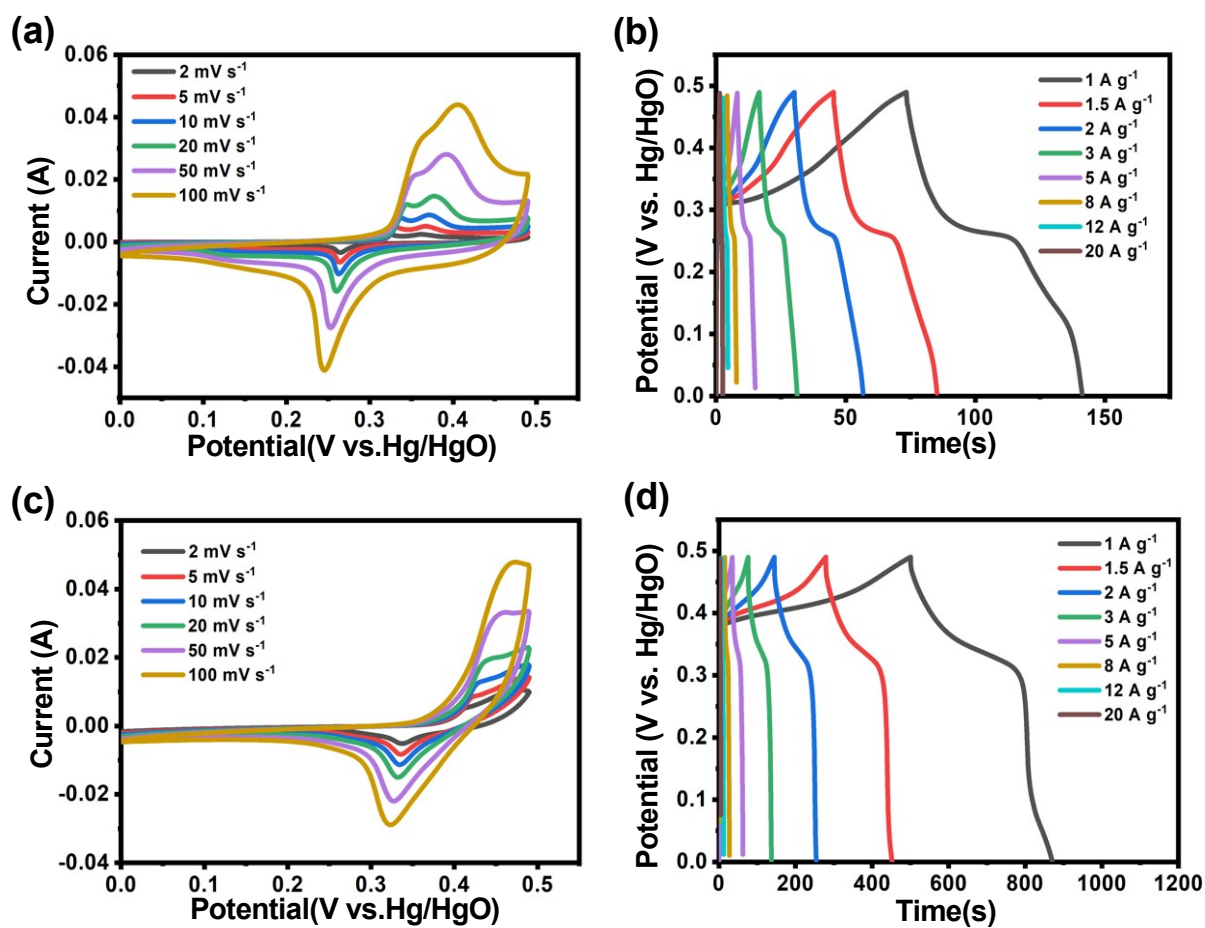

**Figure S9** (a) CV curves and (b) GCD curves of Co-NiBTC. (c) CV curves and (d) GCD curves of Co-NiS<sub>2</sub>.

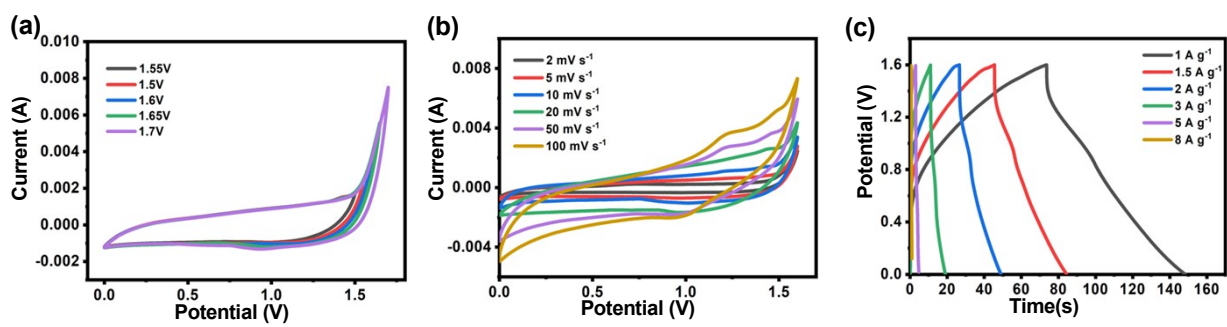

**Figure S10** (a) CV curves at 10 mV s<sup>-1</sup>, (b) CV curves and (c) GCD curves of Co-NiS<sub>2</sub>//AC ASC device.

**Table S1.** Adsorption configurations and energies (eV) of OH<sup>-</sup>.

| Samples                | NiO       | Co-NiO(Ni) | Co-NiO(Co) | NiS <sub>2</sub> | Co-NiS <sub>2</sub> (Ni) | Co-NiS <sub>2</sub> (Co) |
|------------------------|-----------|------------|------------|------------------|--------------------------|--------------------------|
| Before Adsorption (eV) | -117.8322 | -137.9754  | -137.9754  | -98.7659         | -162.2247                | -162.2247                |
| After Adsorption (eV)  | -125.7464 | -146.1379  | -145.8362  | -108.6614        | -173.9410                | -173.5748                |
| OH <sup>-</sup>        |           |            |            | -7.0816          |                          |                          |
| Adsorption energy (eV) | -0.8326   | -1.0809    | -0.7792    | -2.8139          | -4.6347                  | -4.2685                  |

**Table S2.** The relative contents of elements in Co-NiBTC, Co-NiO, Co-NiS<sub>2</sub> and Co-NiS<sub>2</sub>/C were derived from XPS data.

| Samples   | Co-NiBTC | Co-NiO | Co-NiS <sub>2</sub> | Co-NiS <sub>2</sub> /C |
|-----------|----------|--------|---------------------|------------------------|
| Co (At %) | 1.36     | 8.52   | 1.16                | 0.79                   |
| Ni (At %) | 4.78     | 27.71  | 3.93                | 2.17                   |
| C (At %)  | 58.16    | 10.42  | 38.03               | 39.52                  |
| O (At %)  | 35.7     | 53.35  | 42.8                | 31.8                   |
| S (At %)  | /        | /      | 14.08               | 25.71                  |

**Table S3.** The R<sub>s</sub> and R<sub>ct</sub> of different electrodes.

| Samples             | Co-NiO | Co-NiS <sub>2</sub> | Co-NiS <sub>2</sub> /C |
|---------------------|--------|---------------------|------------------------|
| R <sub>s</sub> (Ω)  | 0.75   | 0.56                | 0.49                   |
| R <sub>ct</sub> (Ω) | 0.71   | 0.59                | 0.53                   |

**Table S4** Electrochemical performance of different ASCs.

| Electrode materials                                | P (W·kg <sup>-1</sup> ) | E (Wh·kg <sup>-1</sup> ) | References |
|----------------------------------------------------|-------------------------|--------------------------|------------|
| Co-NiS <sub>2</sub> /C // AC                       | 1271.5                  | 36.0                     | This work  |
| Co-NiS <sub>2</sub> // AC                          | 1283.2                  | 26.4                     | This work  |
| H-NiMoS <sub>4</sub> /NiS <sub>2</sub> // NCO      | 958.6                   | 38.6                     | 1          |
| CuCo <sub>2</sub> S <sub>4</sub> -rGO // AC        | 450                     | 16.0                     | 2          |
| NiS // AC                                          | 900                     | 31                       | 3          |
| GH@NC@Co <sub>9</sub> S <sub>8</sub> // GH@NC      | 800                     | 23.6                     | 4          |
| Co <sub>9</sub> S <sub>8</sub> -NSA // AC          | 828.5                   | 20                       | 5          |
| CoNiLDH-rGO-CoNi <sub>2</sub> S <sub>4</sub> // AC | 749.9                   | 31.6                     | 6          |
| Ni-CoP@C@CNT // GO                                 | 699.1                   | 17.4                     | 7          |

- 1 B. Huang, J. Yuan, Y. Lu, Y. Zhao, X. Qian, H. Xu, G. He and H. Chen, *Chemical Engineering Journal*, , DOI:10.1016/j.cej.2022.135231.
- 2 L. Wu, L. Sun, X. Li, Q. Zhang, Y. Zhang, J. Gu and K. Wang, 2020, **2001468**, 1–12.
- 3 B. Guan, Y. Li, B. Yin, K. Liu, D. Wang, H. Zhang and C. Cheng, *Chemical Engineering Journal*, 2017, **308**, 1165–1173.
- 4 H. Niu, Y. Zhang, Y. Liu, B. Luo, N. Xin and W. Shi, *J Mater Chem A Mater*, 2019, **7**, 8503–8509.
- 5 X. Han, K. Tao, D. Wang and L. Han, *Nanoscale*, 2018, **10**, 2735–2741.
- 6 J. Hu, L. Sun, F. Xie, Y. Qu, H. Tan, X. Shi, J. Qian, K. Wang and Y. Zhang, *J Mater Chem A Mater*, 2022, **10**, 21590–21602.
- 7 J. Gu, L. Sun, Y. Zhang, Q. Zhang, X. Li, H. Si, Y. Shi and C. Sun, *Chemical Engineering Journal*, 2020, **385**, 123454.
